# Supplementary material for: Anodic voltage performance of conducting polymer-functionalized boron nitride nanosheets: a DFT assessment
Source: Royal Society of Chemistry journal article supplement (doi:10.1039/d3cp06074h), 2024-01-01
Supplement: d3cp06074h1.pdf [file d3cp06074h1.pdf]

Supplementary Information

**Anodic voltage performance of conducting polymer-functionalized boron  
nitride nanosheets: A DFT assessment**

Chidera C. Nnadi<sup>a</sup>, Hasnain Sajid<sup>b</sup>, Ismail Abdulazeez<sup>c</sup>, Abdulaziz Al-Saadi<sup>a,d,\*</sup>

<sup>a</sup>*Chemistry Department, King Fahd University of Petroleum & Minerals, Dhahran 31261, Saudi Arabia*

<sup>b</sup>*School of Science and Technology, Nottingham Trent University, Clifton Lane, Nottingham, NG11 8NS, UK*

<sup>c</sup>*Interdisciplinary Research Center for Membranes and Water Security, King Fahd University of Petroleum & Minerals, Dhahran 31261, Saudi Arabia*

<sup>d</sup>*Interdisciplinary Research Center for Refining and Advanced Chemicals, King Fahd University of Petroleum & Minerals, Dhahran 31261, Saudi Arabia*

\* *Corresponding author: Dr. Abdulaziz Al-Saadi ([asaadi@kfupm.edu.sa](mailto:asaadi@kfupm.edu.sa))*

## Supplementary Information

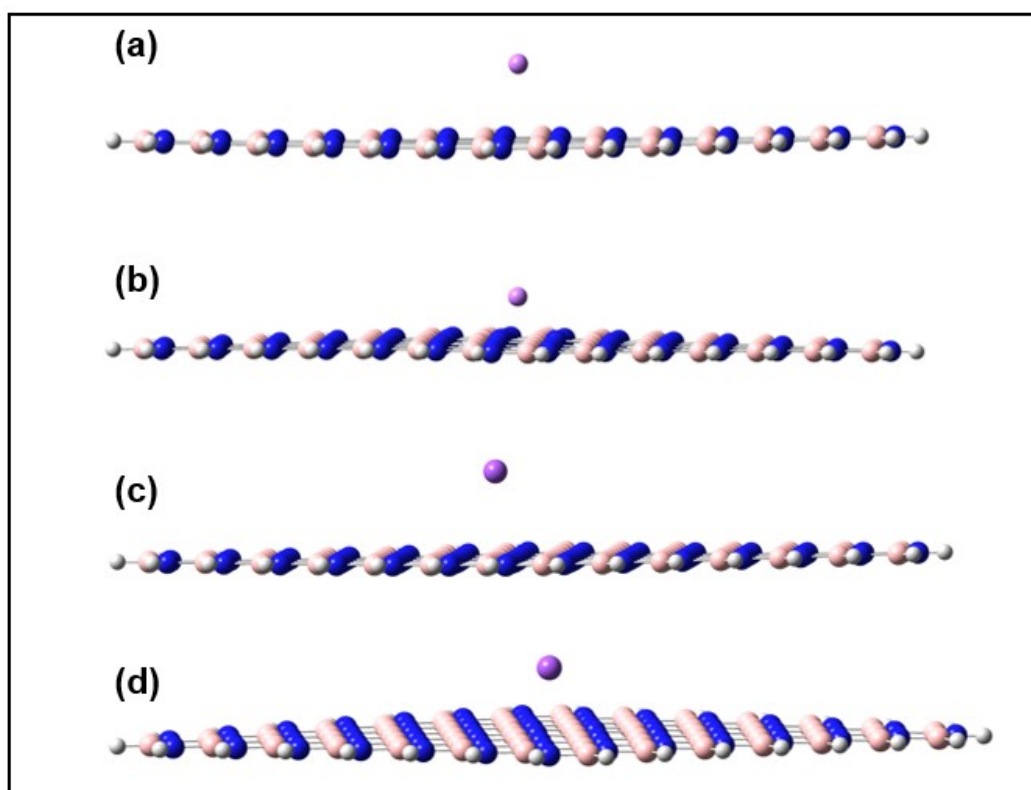

**Figure S1.** Optimized cross-sectional structures of (a) Li@BNNS (b) Li<sup>+</sup>@BNNS, (c) Na@BNNS, and (d) Na<sup>+</sup>@BNNS. The pristine boron nitride nanosheet (BNNS) comprises 63 atoms of boron and nitrogen each with dangling atoms at the structural boundaries saturated with hydrogen atoms to minimize the boundary effects [37].

## Supplementary Information

**Table S1.** Adsorption distances of metals and metal-ions on BNNS complexes.

| <b>BNNS</b>                                 | <b>Li@BNNS</b> | <b>Li<sup>+</sup>@BNNS</b> | <b>Na@BNNS</b> | <b>Na<sup>+</sup>@BNNS</b> |
|---------------------------------------------|----------------|----------------------------|----------------|----------------------------|
| <b>B-N Bond Distance (Å)</b>                |                |                            |                |                            |
| 1.45                                        | 1.45           | 1.46                       | 1.45           | 1.46                       |
| <b>M/M<sup>n+</sup>-N Bond Distance (Å)</b> |                |                            |                |                            |
| 0.00                                        | 3.31           | 2.23                       | 3.66           | 2.73                       |
| <b>M/M<sup>n+</sup>-B Bond Distance (Å)</b> |                |                            |                |                            |
| 0.00                                        | 3.33           | 2.33                       | 3.91           | 2.80                       |

## Supplementary Information

**Table S2.** Adsorption distances of conducting polymers, metals, and metal-ions on BNNS and CP-BNNS complexes.

| <b>B-N Bond Distance (Å)</b>                |                  |                     |                                 |                     |                                 |                |                |                   |                               |                   |                               |
|---------------------------------------------|------------------|---------------------|---------------------------------|---------------------|---------------------------------|----------------|----------------|-------------------|-------------------------------|-------------------|-------------------------------|
| <b>PA-BNNS</b>                              | <b>PA-BNNS</b>   | <b>Li@PA-BNNS</b>   | <b>Li<sup>+</sup>@PA-BNNS</b>   | <b>Na@PA-BNNS</b>   | <b>Na<sup>+</sup>@PA-BNNS</b>   | <b>PP-BNNS</b> | <b>PP-BNNS</b> | <b>Li@PP-BNNS</b> | <b>Li<sup>+</sup>@PP-BNNS</b> | <b>Na@PP-BNNS</b> | <b>Na<sup>+</sup>@PP-BNNS</b> |
|                                             |                  | 1.55                | 1.48                            | 1.48                | 1.48                            |                | 1.48           |                   | 1.56                          | 1.45<br>(float)   | 1.48                          |
| <b>PPPh-BNNS</b>                            | <b>PPPh-BNNS</b> | <b>Li@PPPh-BNNS</b> | <b>Li<sup>+</sup>@PPPh-BNNS</b> | <b>Na@PPPh-BNNS</b> | <b>Na<sup>+</sup>@PPPh-BNNS</b> | <b>PT-BNNS</b> | <b>PT-BNNS</b> | <b>Li@PT-BNNS</b> | <b>Li<sup>+</sup>@PT-BNNS</b> | <b>Na@PT-BNNS</b> | <b>Na<sup>+</sup>@PT-BNNS</b> |
|                                             |                  | 1.56                | 1.46(float)                     | 1.48                | 1.45(float)                     |                | 1.48           |                   | 1.56                          | 1.46(float)       | 1.49                          |
| <b>M/M<sup>n+</sup>-N Bond Distance (Å)</b> |                  |                     |                                 |                     |                                 |                |                |                   |                               |                   |                               |
| <b>PA-BNNS</b>                              | <b>PA-BNNS</b>   | <b>Li@PA-BNNS</b>   | <b>Li<sup>+</sup>@PA-BNNS</b>   | <b>Na@PA-BNNS</b>   | <b>Na<sup>+</sup>@PA-BNNS</b>   | <b>PP-BNNS</b> | <b>PP-BNNS</b> | <b>Li@PP-BNNS</b> | <b>Li<sup>+</sup>@PP-BNNS</b> | <b>Na@PP-BNNS</b> | <b>Na<sup>+</sup>@PP-BNNS</b> |
|                                             |                  | -                   | 2.97                            | 2.36                | 2.85                            |                | 2.71           |                   | -                             | 2.83              | 2.60                          |
| <b>PPPh-BNNS</b>                            | <b>PPPh-BNNS</b> | <b>Li@PPPh-BNNS</b> | <b>Li<sup>+</sup>@PPPh-BNNS</b> | <b>Na@PPPh-BNNS</b> | <b>Na<sup>+</sup>@PPPh-BNNS</b> | <b>PT-BNNS</b> | <b>PT-BNNS</b> | <b>Li@PT-BNNS</b> | <b>Li<sup>+</sup>@PT-BNNS</b> | <b>Na@PT-BNNS</b> | <b>Na<sup>+</sup>@PT-BNNS</b> |
|                                             |                  | -                   | 2.32                            | 2.28                | 2.74                            |                | 2.92           |                   | -                             | 3.15              | 2.22                          |
| <b>M/M<sup>n+</sup>-B Bond Distance (Å)</b> |                  |                     |                                 |                     |                                 |                |                |                   |                               |                   |                               |
| <b>PA-BNNS</b>                              | <b>PA-BNNS</b>   | <b>Li@PA-BNNS</b>   | <b>Li<sup>+</sup>@PA-BNNS</b>   | <b>Na@PA-BNNS</b>   | <b>Na<sup>+</sup>@PA-BNNS</b>   | <b>PP-BNNS</b> | <b>PP-BNNS</b> | <b>Li@PP-BNNS</b> | <b>Li<sup>+</sup>@PP-BNNS</b> | <b>Na@PP-BNNS</b> | <b>Na<sup>+</sup>@PP-BNNS</b> |
|                                             |                  | -                   | 2.58                            | 2.46                | 2.91                            |                | 2.83           |                   | -                             | 2.68              | 2.45                          |
| <b>PPPh-BNNS</b>                            | <b>PPPh-BNNS</b> | <b>Li@PPPh-BNNS</b> | <b>Li<sup>+</sup>@PPPh-BNNS</b> | <b>Na@PPPh-BNNS</b> | <b>Na<sup>+</sup>@PPPh-BNNS</b> | <b>PT-BNNS</b> | <b>PT-BNNS</b> | <b>Li@PT-BNNS</b> | <b>Li<sup>+</sup>@PT-BNNS</b> | <b>Na@PT-BNNS</b> | <b>Na<sup>+</sup>@PT-BNNS</b> |
|                                             |                  | -                   | 2.40                            | 2.39                | 2.67                            |                | 3.02           |                   | -                             | 2.69              | 2.68                          |

# Supplementary Information

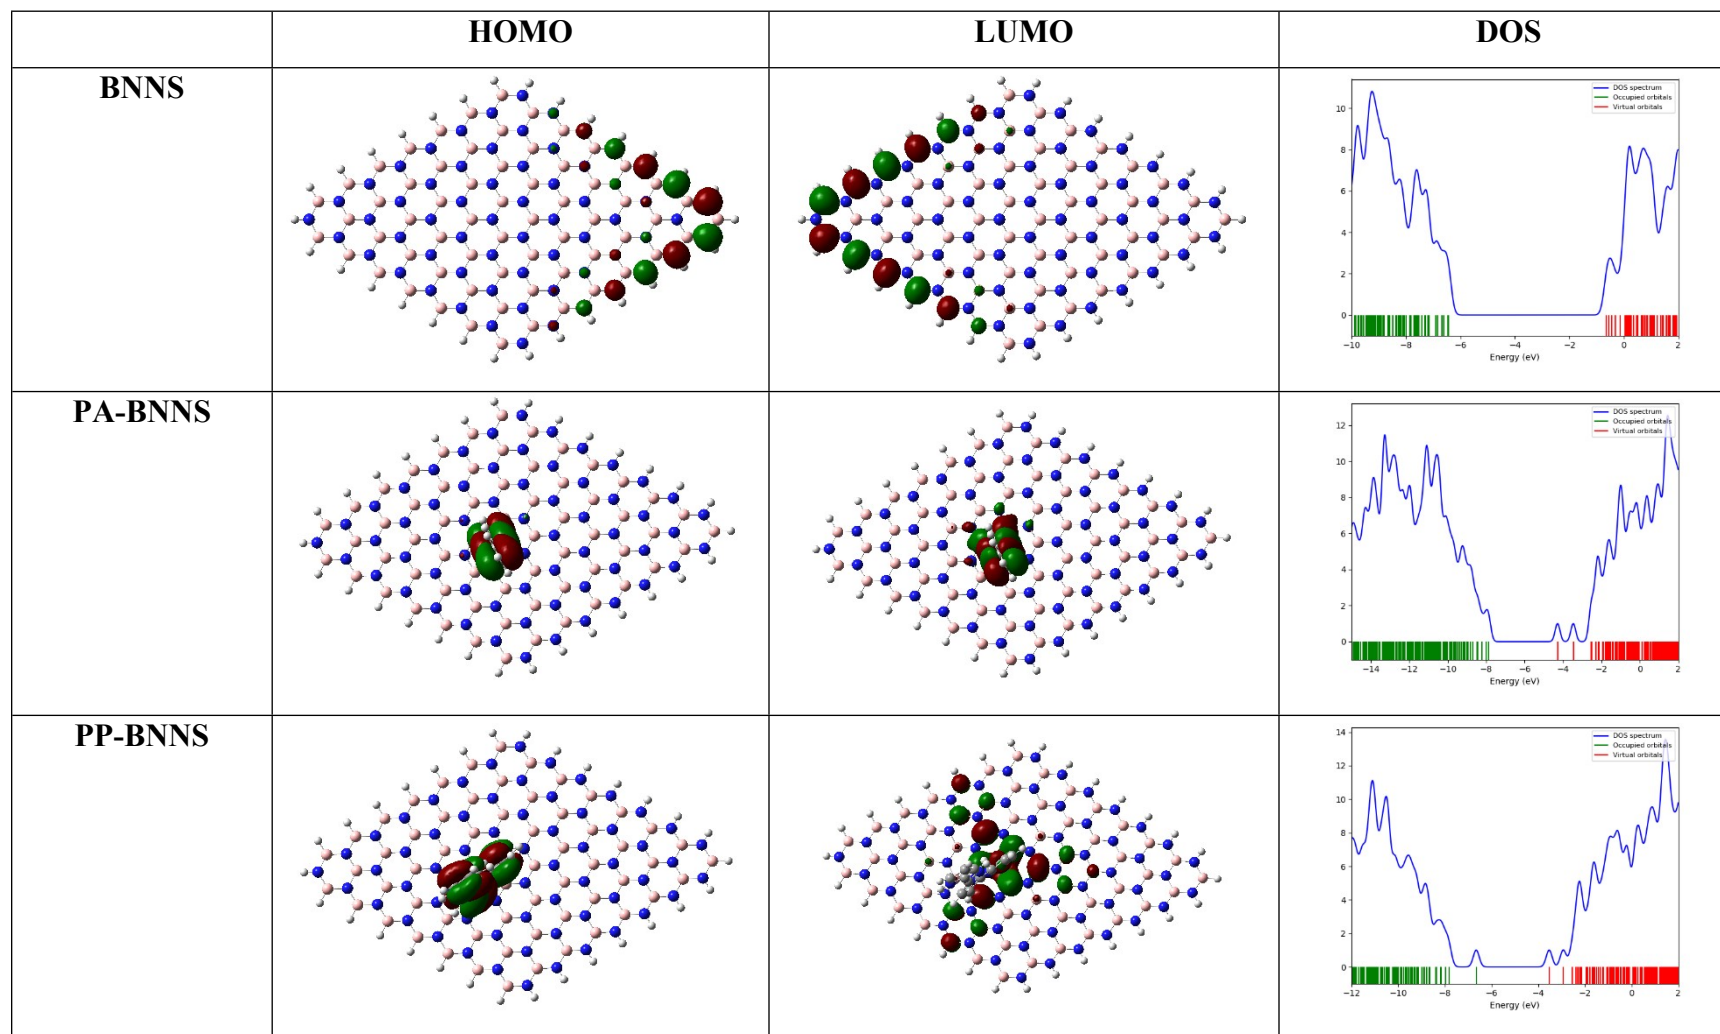

## Supplementary Information

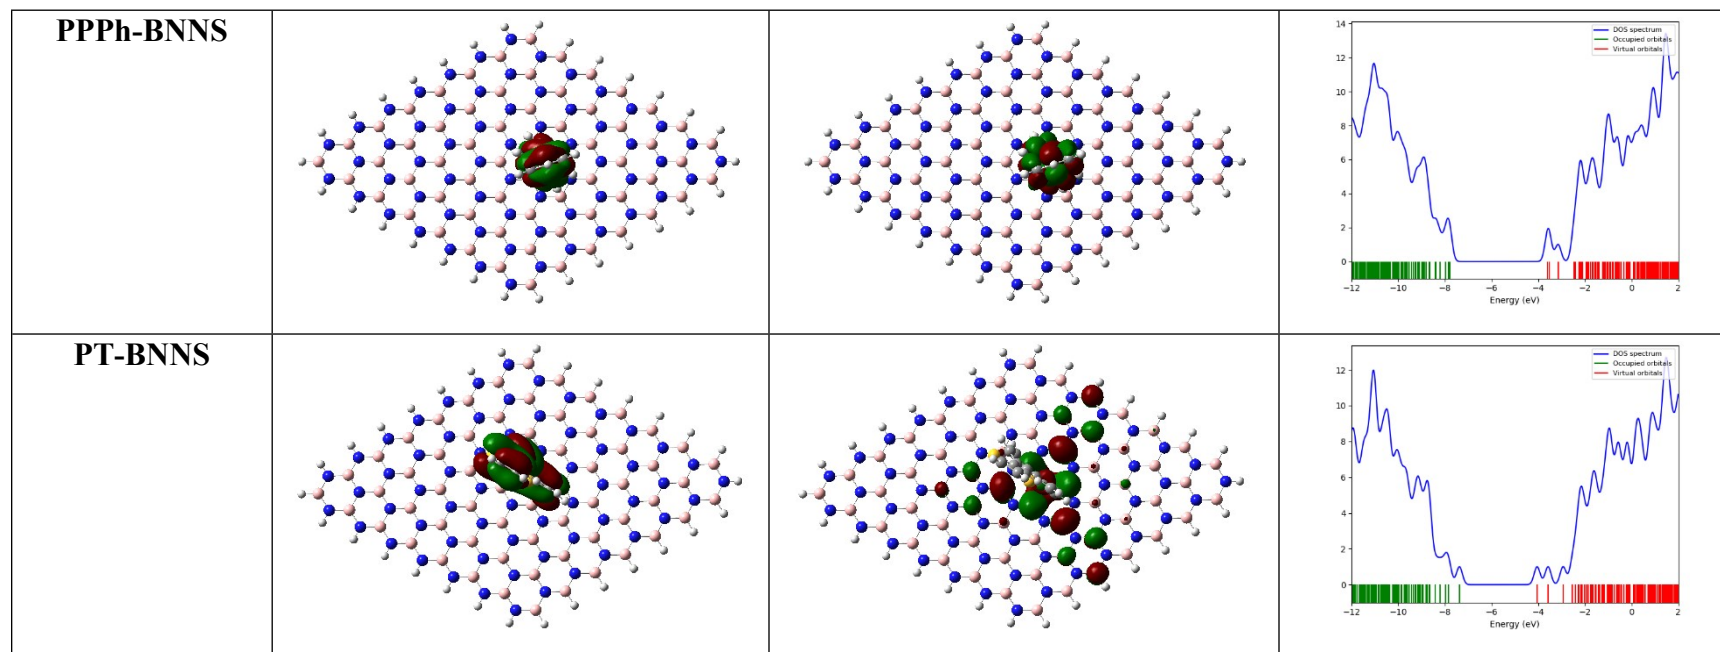

**Figure S2.** The HOMO and LUMO iso-surfaces of the conducting polymers adsorbed onto the BNNS (M/Mn+@BNNS).

## Supplementary Information

**Table S3.** HOMO, LUMO, band gap and adsorption energies (all in eV) of metal atoms and ions on BNNS and CP-BNNS complexes compared to bare and functionalized BNNS structures.

|                                 | <b>HOMO</b> | <b>LUMO</b> | <b><math>E_g</math></b> | <b><math>E_d</math></b> |
|---------------------------------|-------------|-------------|-------------------------|-------------------------|
| <b>BNNS</b>                     | -6.45       | -0.64       | 5.81                    |                         |
| <b>Li@BNNS</b>                  | -3.07       | -0.66       | 2.41                    | -11.85                  |
| <b>Li<sup>+</sup>@BNNS</b>      | -7.98       | -4.07       | 3.91                    | -49.97                  |
| <b>Na@BNNS</b>                  | -2.91       | -0.66       | 2.25                    | -7.50                   |
| <b>Na<sup>+</sup>@BNNS</b>      | -7.96       | -3.99       | 3.96                    | -32.35                  |
| <b>PA-BNNS</b>                  |             |             |                         |                         |
| <b>PA-BNNS</b>                  | -7.86       | -4.28       | 3.58                    | 536.18                  |
| <b>Li@PA-BNNS</b>               | -7.42       | -3.47       | 3.94                    | -33.30                  |
| <b>Li<sup>+</sup>@PA-BNNS</b>   | -9.75       | -7.25       | 2.50                    | -6.97                   |
| <b>Na@PA-BNNS</b>               | -7.90       | -3.83       | 4.07                    | -23.16                  |
| <b>Na<sup>+</sup>@PA-BNNS</b>   | -9.91       | -6.92       | 2.99                    | 7.84                    |
| <b>PP-BNNS</b>                  |             |             |                         |                         |
| <b>PP-BNNS</b>                  | -6.66       | -3.53       | 3.13                    | 535.87                  |
| <b>Li@PP-BNNS</b>               | -7.35       | -3.62       | 3.73                    | -92.94                  |
| <b>Li<sup>+</sup>@PP-BNNS</b>   | -8.99       | -6.04       | 2.95                    | -8.46                   |
| <b>Na@PP-BNNS</b>               | -7.21       | -3.49       | 3.72                    | -81.89                  |
| <b>Na<sup>+</sup>@PP-BNNS</b>   | -9.23       | -5.17       | 4.06                    | -16.52                  |
| <b>PPPh-BNNS</b>                |             |             |                         |                         |
| <b>PPPh-BNNS</b>                | -7.81       | -3.60       | 4.21                    | 533.27                  |
| <b>Li@PPPh-BNNS</b>             | -8.05       | -4.28       | 3.78                    | -73.10                  |
| <b>Li<sup>+</sup>@PPPh-BNNS</b> | -9.41       | -6.18       | 3.23                    | -5.10                   |
| <b>Na@PPPh-BNNS</b>             | -8.18       | -4.12       | 4.06                    | -64.48                  |
| <b>Na<sup>+</sup>@PPPh-BNNS</b> | -9.36       | -6.31       | 3.05                    | 6.49                    |
| <b>PT-BNNS</b>                  |             |             |                         |                         |
| <b>PT-BNNS</b>                  | -7.38       | -4.05       | 3.33                    | 539.47                  |
| <b>Li@PT-BNNS</b>               | -7.90       | -4.89       | 3.01                    | -94.64                  |
| <b>Li<sup>+</sup>@PT-BNNS</b>   | -9.22       | -7.03       | 2.19                    | -5.48                   |
| <b>Na@PT-BNNS</b>               | -7.77       | -4.72       | 3.05                    | -82.41                  |
| <b>Na<sup>+</sup>@PT-BNNS</b>   | -10.07      | -6.26       | 3.82                    | -9.62                   |

# Supplementary Information

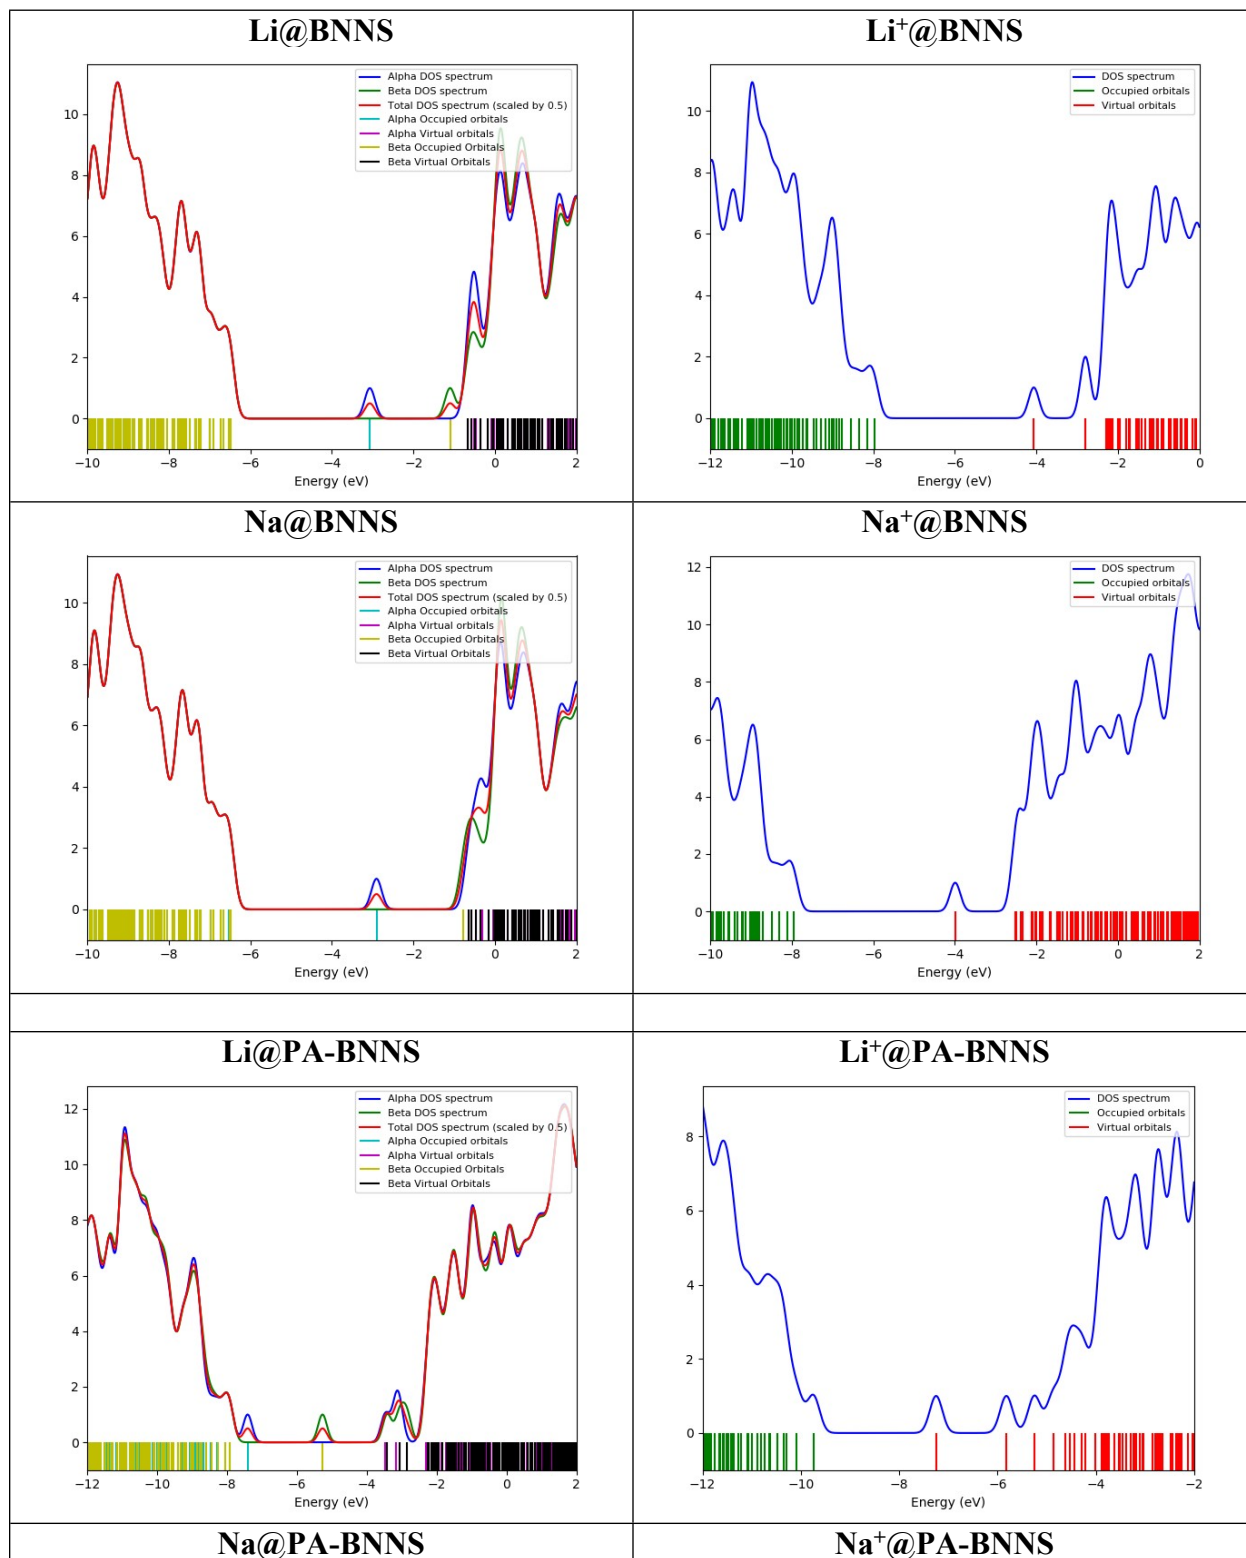



# Supplementary Information

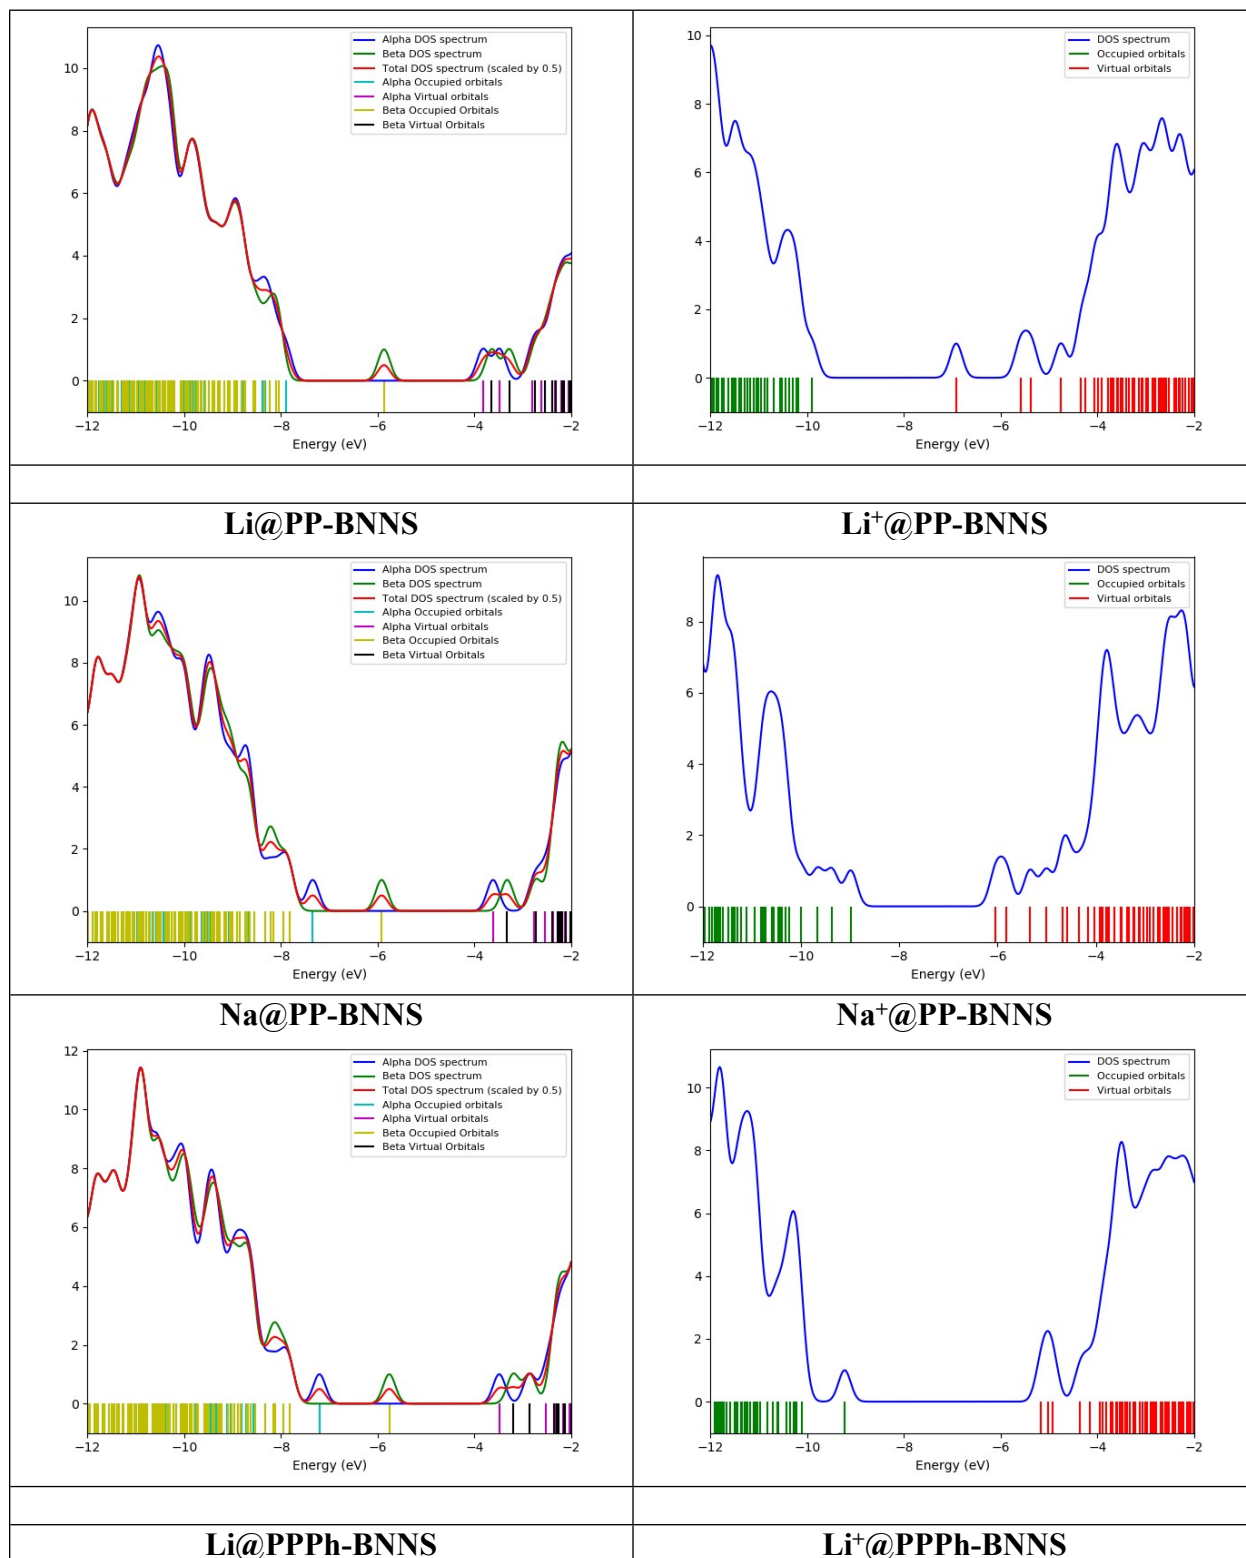

# Supplementary Information

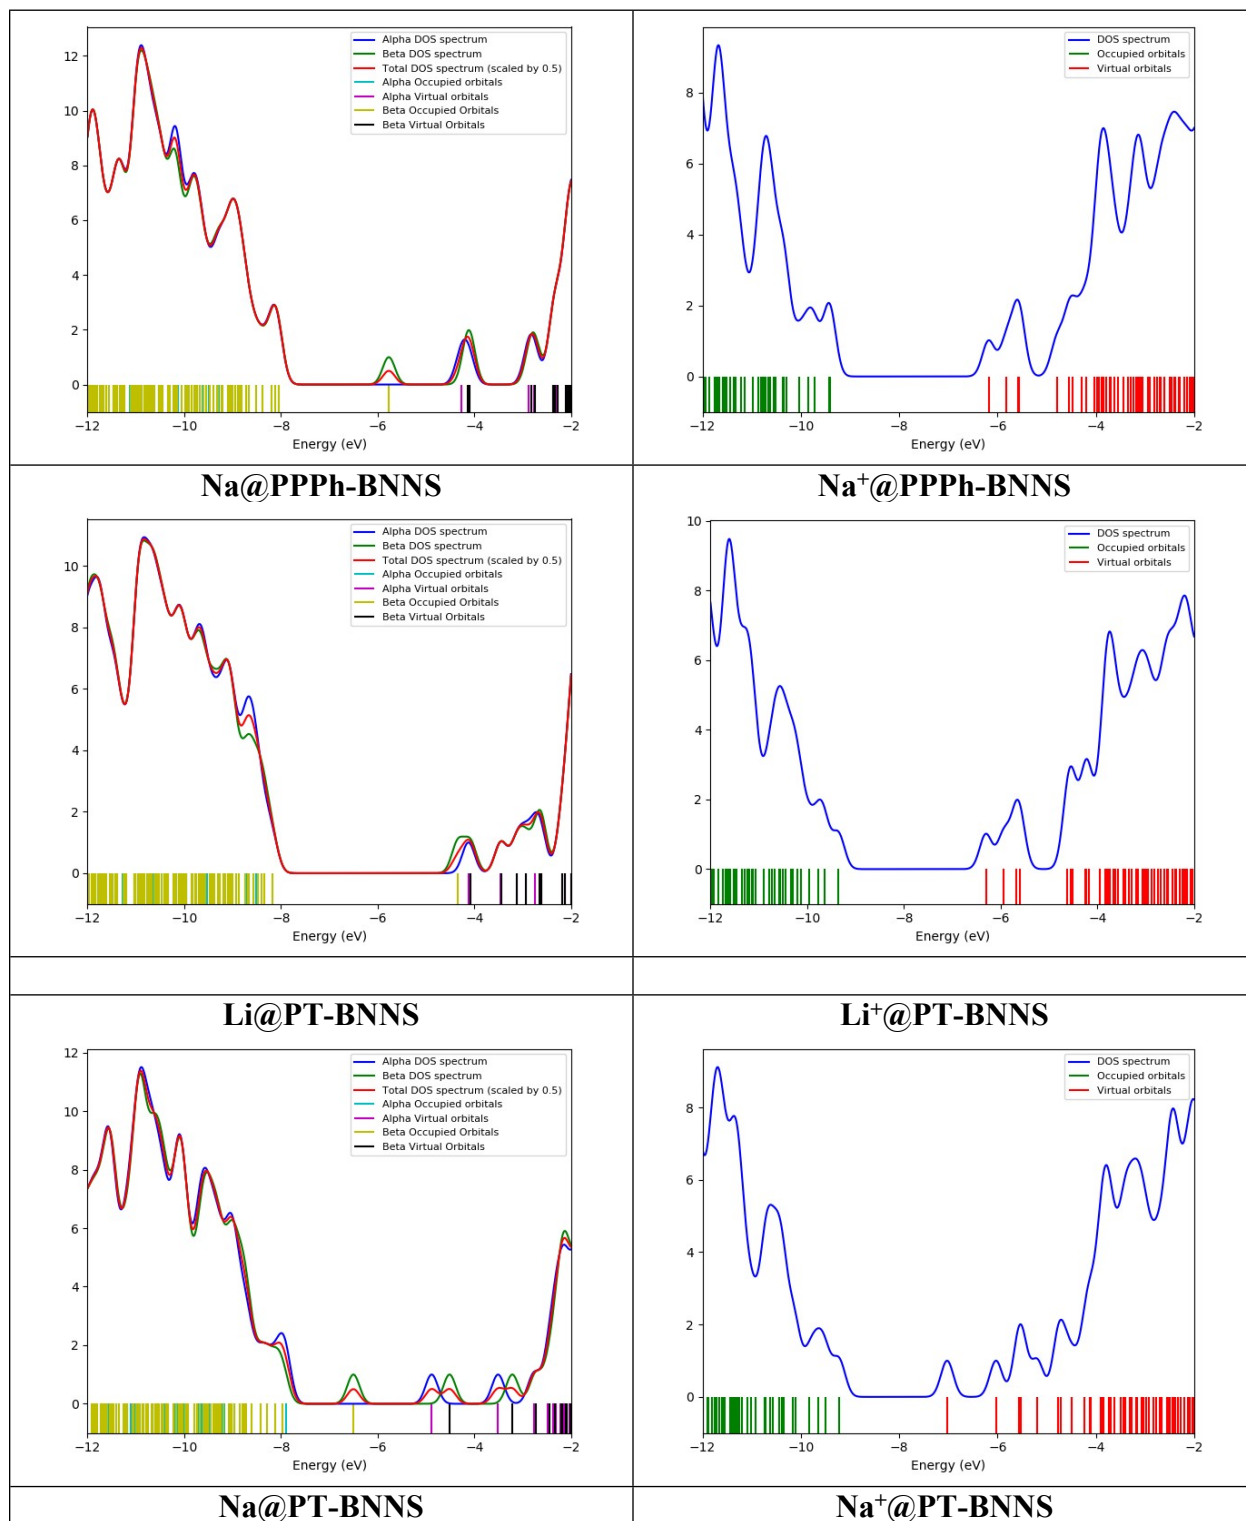

## Supplementary Information

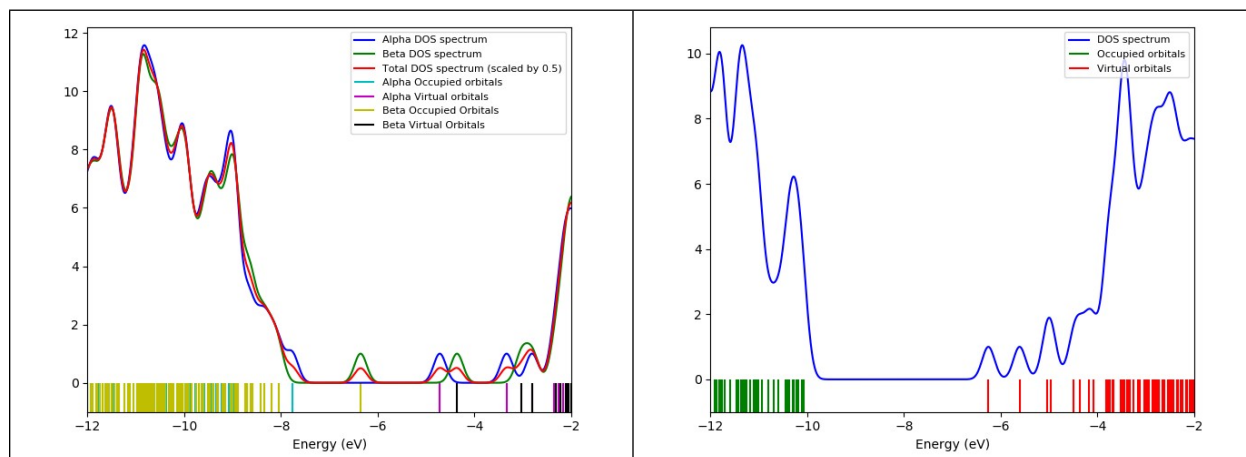

**Figure S3.** The density of States of the metal atoms and ions adsorbed onto the CP-BNNS.

## Supplementary Information

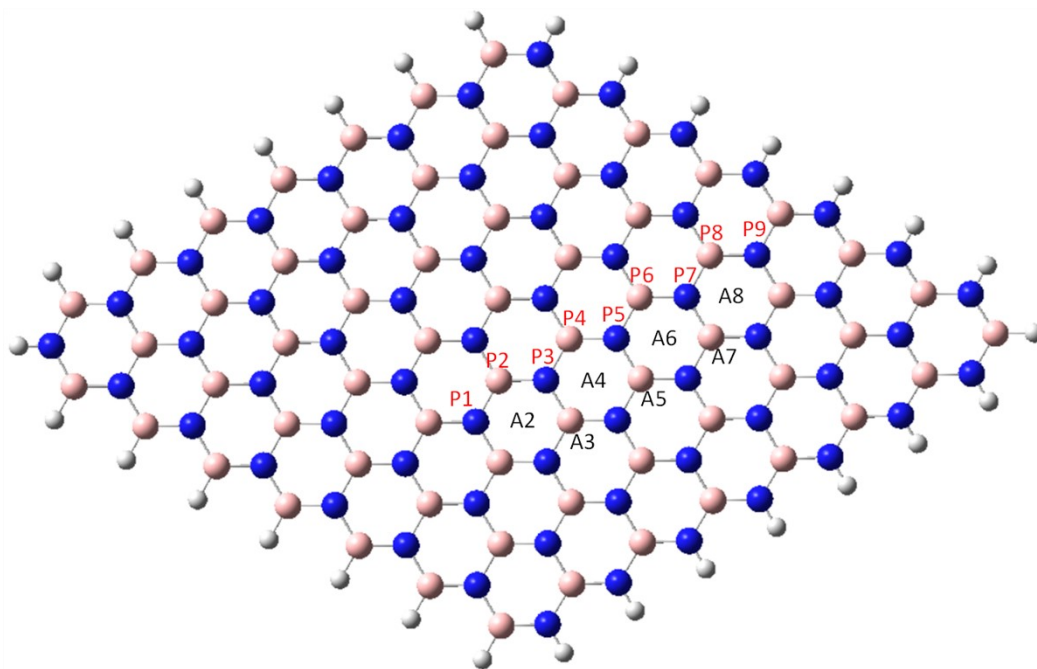

**Path 1** (via B-N bonds): P1-P2-P3-P4-P5-P6-P7-P8-P9

**Path 2** (via ring-B): P1-A2-A3-A4-A5-A6-A7-A8-P9

**Path 3** (via ring-N): P1-A2-P3-A4-P5-A6-P7-A8-P9

**Figure S4.** The pathway of ion diffusion on the sheets

## Supplementary Information

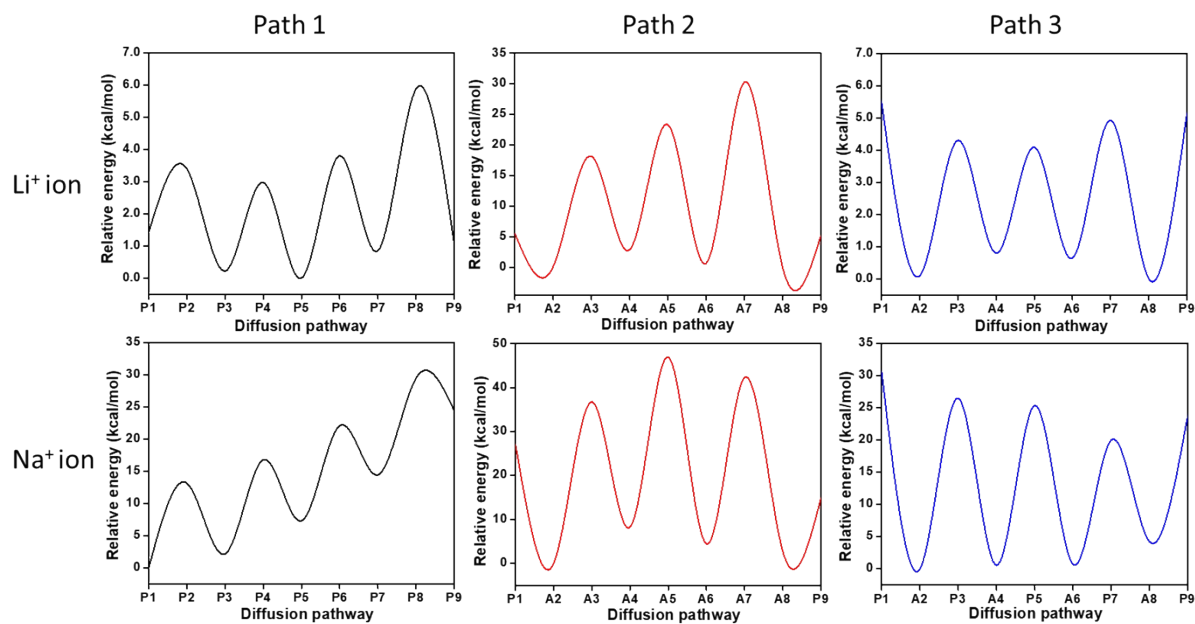

**Figure S5.** The diffusion profile of  $\text{Li}^+$  and  $\text{Na}^+$  ions via path 1, path 2 and path 3 on the pristine BNNS sheet

## Supplementary Information

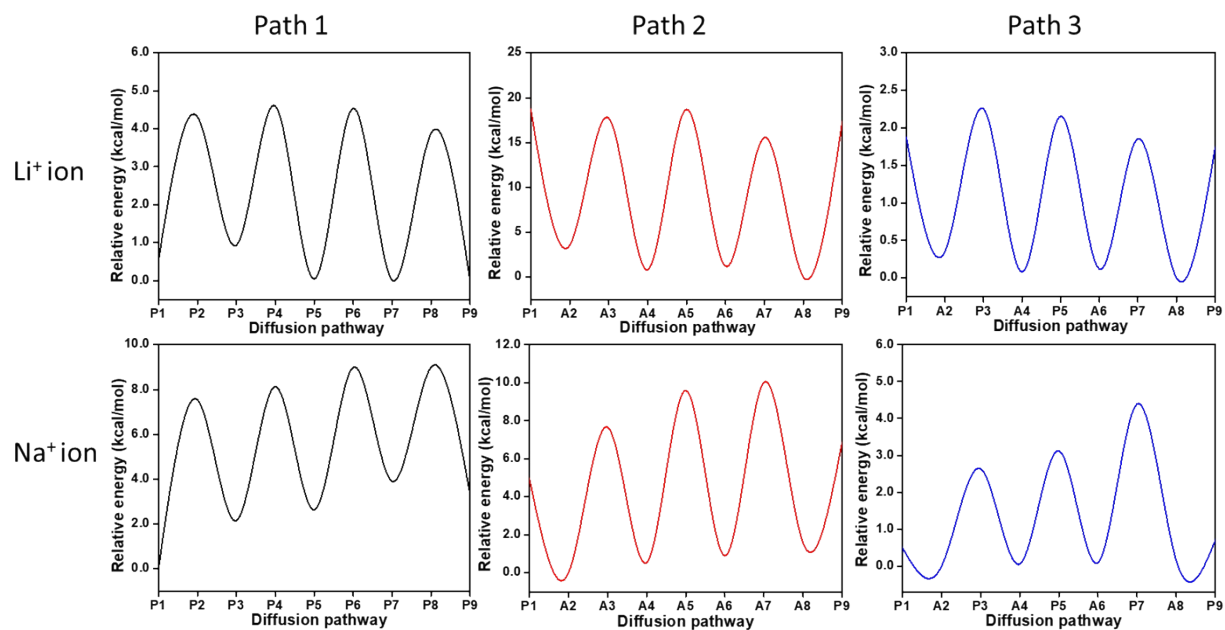

**Figure S6.** The diffusion profile of  $\text{Li}^+$  and  $\text{Na}^+$  ions via path 1, path 2 and path 3 on the PT functionalized BNNS sheet

## Supplementary Information

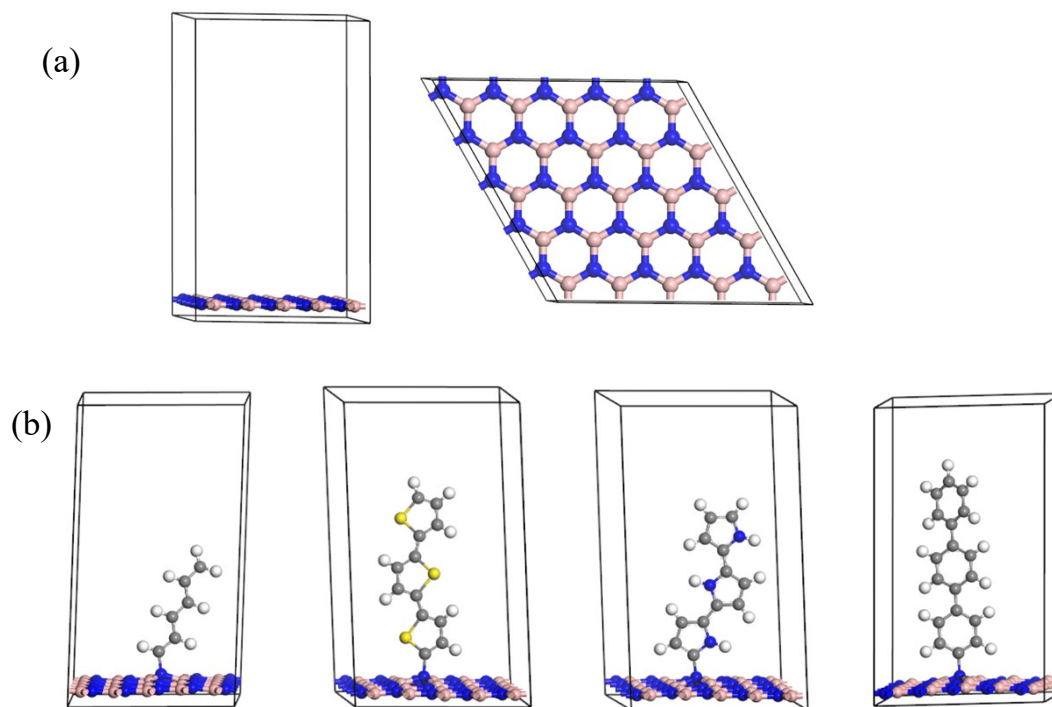

**Figure S7** The geometrically optimized supercell with lattice dimensions of  $12 \times 12 \times 20 \text{ \AA}$  of (a) BNNS, and the conducting polymer functionalized BNNS (b) from left to right: PA-BNNS, PT-BNNS, PP-BNNS and PPh-BNNS

## Supplementary Information

**Table S4.** The electronic properties of the pristine and the CP functionalized BNNS sheets

| System                     | Cluster model |             |       | Periodic system |             |       |
|----------------------------|---------------|-------------|-------|-----------------|-------------|-------|
|                            | <b>HOMO</b>   | <b>LUMO</b> | $E_g$ | <b>HOMO</b>     | <b>LUMO</b> | $E_g$ |
| BNNS                       | -6.45         | -0.64       | 5.81  | -6.89           | -1.02       | 5.87  |
| PA-BNNS                    | -7.86         | -4.28       | 3.58  | -5.55           | -3.14       | 2.41  |
| Li@PA-BNNS                 | -7.42         | -3.47       | 3.94  | -5.75           | -2.50       | 3.25  |
| Li <sup>+</sup> @PA-BNNS   | -9.75         | -7.25       | 2.50  | -5.36           | -3.19       | 2.18  |
| Na@PA-BNNS                 | -7.90         | -3.83       | 4.07  | -7.01           | -3.28       | 3.73  |
| Na <sup>+</sup> @PA-BNNS   | -9.91         | -6.92       | 2.99  | -5.65           | -3.25       | 2.39  |
| PP-BNNS                    | -6.66         | -3.53       | 3.13  | -4.96           | -2.69       | 2.27  |
| Li@PP-BNNS                 | -7.35         | -3.62       | 3.73  | -4.88           | -2.55       | 2.34  |
| Li <sup>+</sup> @PP-BNNS   | -8.99         | -6.04       | 2.95  | -5.03           | -2.92       | 2.11  |
| Na@PP-BNNS                 | -7.21         | -3.49       | 3.72  | -4.87           | -2.15       | 2.99  |
| Na <sup>+</sup> @PP-BNNS   | -9.23         | -5.17       | 4.06  | -4.88           | -1.11       | 3.77  |
| PPPh-BNNS                  | -7.81         | -3.60       | 4.21  | -5.80           | -2.41       | 3.38  |
| Li@PPPh-BNNS               | -8.05         | -4.28       | 3.78  | -5.64           | -2.87       | 2.77  |
| Li <sup>+</sup> @PPPh-BNNS | -9.41         | -6.18       | 3.23  | -5.58           | -2.89       | 2.69  |
| Na@PPPh-BNNS               | -8.18         | -4.12       | 4.06  | -5.81           | -2.96       | 2.85  |
| Na <sup>+</sup> @PPPh-BNNS | -9.36         | -6.31       | 3.05  | -5.78           | -3.20       | 2.58  |
| PT-BNNS                    | -7.38         | -4.05       | 3.33  | -5.04           | -2.56       | 2.48  |
| Li@PT-BNNS                 | -7.90         | -4.89       | 3.01  | -5.14           | -3.50       | 1.63  |
| Li <sup>+</sup> @PT-BNNS   | -9.22         | -7.03       | 2.19  | -4.92           | -3.44       | 1.48  |
| Na@PT-BNNS                 | -7.77         | -4.72       | 3.05  | -5.05           | -2.87       | 2.18  |
| Na <sup>+</sup> @PT-BNNS   | -10.07        | -6.26       | 3.82  | -5.02           | -1.76       | 3.27  |
